# Supplementary material for: Lifestyle and Psychological Factors Associated with Pregnancy Intentions: Findings from a Longitudinal Cohort Study of Australian Women
Source: Int J Environ Res Public Health. 2019 Dec 13;16(24):5094. doi: 10.3390/ijerph16245094 (PMC6950695; doi:10.3390/ijerph16245094)
Supplement: Supplementary file 1 [file ijerph-16-05094-s001.pdf]

**Lifestyle and psychological factors associated with pregnancy intentions: Findings from  
a longitudinal cohort study of Australian women**

**SUPPLEMENTARY TABLES**

**Supplementary Table 1.** Sensitivity analyses, reporting adjusted odds ratios (aOR), 95% Confidence Intervals (95%CI), and *p*-values from multivariable logistic regression analyses highlighting associations between pregnancy intentions and demographic, lifestyle and psychological variables at age 25 to 30 years (Wave 3).

| Variable                               | Included women who were unable to have children |                 | Included women or their partner who were unable to have children |                 |
|----------------------------------------|-------------------------------------------------|-----------------|------------------------------------------------------------------|-----------------|
|                                        | aOR (95%CI)                                     | <i>p</i> -value | aOR (95%CI)                                                      | <i>p</i> -value |
| <i>Age</i>                             | 1.2 (1.1-1.3)                                   | <b>&lt;.001</b> | 1.2 (1.1-1.3)                                                    | <b>&lt;.001</b> |
| <i>Number of children</i>              | 0.5 (0.4-0.6)                                   | <b>&lt;.001</b> | 0.5 (0.4-0.6)                                                    | <b>&lt;.001</b> |
| <i>Education</i>                       |                                                 |                 |                                                                  |                 |
| No formal/high school                  | REF                                             |                 | REF                                                              |                 |
| Trade/diploma                          | 0.9 (0.7-1.2)                                   | .434            | 0.9 (0.7-1.2)                                                    | .437            |
| Degree                                 | 0.5 (0.4-0.7)                                   | <b>&lt;.001</b> | 0.5 (0.4-0.7)                                                    | <b>&lt;.001</b> |
| <i>Employment status</i>               |                                                 |                 |                                                                  |                 |
| No paid work                           | REF                                             |                 | REF                                                              |                 |
| Paid work                              | 0.7 (0.5-1.0)                                   | <b>.023</b>     | 0.7 (0.5-1.0)                                                    | <b>.031</b>     |
| <i>Annual household income (AUD\$)</i> |                                                 |                 |                                                                  |                 |
| <\$25,999                              | REF                                             |                 | REF                                                              |                 |
| \$26,000 - \$77,999                    | 1.0 (0.6-1.6)                                   | .998            | 1.0 (0.6-1.6)                                                    | 1.000           |
| ≥\$78,000                              | 0.9 (0.5-1.4)                                   | .535            | 0.9 (0.5-1.4)                                                    | .547            |
| <i>Marital Status</i>                  |                                                 |                 |                                                                  |                 |
| Not married or de facto                | REF                                             |                 | REF                                                              |                 |
| Married or de facto                    | 23.5 (12.7-43.2)                                | <b>&lt;.001</b> | 23.3 (12.7-42.9)                                                 | <b>&lt;.001</b> |
| <i>Country of birth</i>                |                                                 |                 |                                                                  |                 |
| Australia                              | REF                                             |                 | REF                                                              |                 |
| Other English-speaking background      | 0.9 (0.5-1.6)                                   | .642            | 0.8 (0.5-1.6)                                                    | .591            |
| Europe                                 | 0.3 (0.0-2.1)                                   | .222            | 0.3 (0.0-2.2)                                                    | .226            |
| Asia                                   | 1.2 (0.5-3.1)                                   | .738            | 1.2 (0.5-3.1)                                                    | .730            |
| Other                                  | 0.5 (0.1-4.1)                                   | .538            | 0.5 (0.1-4.1)                                                    | .547            |
| <i>BMI Category</i>                    |                                                 |                 |                                                                  |                 |
| Underweight                            | 0.8 (0.4-1.5)                                   | .542            | 0.8 (0.5-1.6)                                                    | .572            |
| Normal weight                          | REF                                             |                 | REF                                                              |                 |

|                                           |               |                 |               |                 |
|-------------------------------------------|---------------|-----------------|---------------|-----------------|
| Overweight                                | 1.1 (0.9-1.5) | .317            | 1.1 (0.9-1.5) | .335            |
| Obese                                     | 1.7 (1.3-2.3) | <b>&lt;.001</b> | 1.7 (1.3-2.3) | <b>&lt;.001</b> |
| <i>Physical activity</i>                  |               |                 |               |                 |
| Sedentary                                 | REF           |                 | REF           |                 |
| Low PA                                    | 0.9 (0.6-1.2) | .407            | 0.9 (0.6-1.3) | .415            |
| Moderate PA                               | 0.8 (0.5-1.2) | .315            | 0.8 (0.5-1.2) | .331            |
| High PA                                   | 0.8 (0.5-1.2) | .355            | 0.8 (0.5-1.2) | .356            |
| <i>Sedentary behaviour (sitting time)</i> | 1.0 (0.9-1.0) | .317            | 1.0 (0.9-1.0) | .319            |
| <i>Diet quality</i>                       | 1.0 (1.0-1.0) | .930            | 1.0 (1.0-1.0) | .913            |
| <i>Alcohol intake</i>                     |               |                 |               |                 |
| None                                      | REF           |                 | REF           |                 |
| Any                                       | 0.7 (0.4-1.0) | <b>.037</b>     | 0.7 (0.4-1.0) | <b>.036</b>     |
| <i>Smoking</i>                            |               |                 |               |                 |
| Never or ex-smoker                        | REF           |                 | REF           |                 |
| Current smoker                            | 1.2 (0.9-1.5) | .224            | 1.2 (0.9-1.5) | .239            |
| <i>Depressive symptoms</i>                |               |                 |               |                 |
| No                                        | REF           |                 | REF           |                 |
| Yes                                       | 0.9 (0.7-1.2) | .563            | 0.9 (0.7-1.2) | .574            |
| <i>Anxiety symptoms</i>                   | 0.9 (0.7-1.0) | .124            | 0.9 (0.7-1.0) | .139            |
| <i>Stress</i>                             | 1.1 (0.8-1.4) | .655            | 1.1 (0.8-1.4) | .637            |

*Note.* REF indicates reference category. Significant associations are indicated in **bold**. Multivariable analysis adjusted for all other variables in the table.

**Supplementary Table 2.** Sensitivity analyses, reporting adjusted odds ratios (aOR), 95% Confidence Intervals (95%CI), and *p*-values from multivariable logistic regression analyses highlighting associations between pregnancy intentions and demographic, lifestyle and psychological variables at age 31 to 36 years (Wave 5).

| Variable                               | Included women who were unable to have children |                 | Included women or their partner who were unable to have children |                 |
|----------------------------------------|-------------------------------------------------|-----------------|------------------------------------------------------------------|-----------------|
|                                        | aOR (95%CI)                                     | <i>p</i> -value | aOR (95%CI)                                                      | <i>p</i> -value |
| <i>Age</i>                             | 1.0 (1.0-1.1)                                   | .493            | 1.1 (1.0-1.1)                                                    | .096            |
| <i>Number of children</i>              | 0.4 (0.3-0.5)                                   | <b>&lt;.001</b> | 0.4 (0.3-0.4)                                                    | <b>&lt;.001</b> |
| <i>Education</i>                       |                                                 |                 |                                                                  |                 |
| No formal/high school                  | REF                                             |                 | REF                                                              |                 |
| Trade/diploma                          | 1.2 (0.8-1.6)                                   | .385            | 1.1 (0.8-1.4)                                                    | .820            |
| Degree                                 | 1.0 (0.7-1.4)                                   | .886            | 0.8 (0.6-1.1)                                                    | .127            |
| <i>Employment status</i>               |                                                 |                 |                                                                  |                 |
| No paid work                           | REF                                             |                 | REF                                                              |                 |
| Paid work                              | 0.6 (0.5-0.8)                                   | <b>.001</b>     | 0.8 (0.6-1.0)                                                    | .106            |
| <i>Annual household income (AUD\$)</i> |                                                 |                 |                                                                  |                 |
| <\$25,999                              | REF                                             |                 | REF                                                              |                 |
| \$26,000 - \$77,999                    | 1.0 (0.4-2.0)                                   | .939            | 1.0 (0.5-1.8)                                                    | .924            |
| ≥\$78,000                              | 1.1 (0.5-2.2)                                   | .847            | 1.0 (0.5-1.9)                                                    | .995            |
| <i>Marital Status</i>                  |                                                 |                 |                                                                  |                 |
| Not married or de facto                | REF                                             |                 | REF                                                              |                 |
| Married or de facto                    | 21.5 (12.8-36.4)                                | <b>&lt;.001</b> | 21.2 (12.6-35.6)                                                 | <b>&lt;.001</b> |
| <i>Country of birth</i>                |                                                 |                 |                                                                  |                 |
| Australia                              | REF                                             |                 | REF                                                              |                 |
| Other English-speaking background      | 1.1 (0.6-1.8)                                   | .781            | 1.1 (0.7-1.8)                                                    | .586            |
| Europe                                 | 1.6 (0.7-3.7)                                   | .264            | 1.6 (0.7-3.7)                                                    | .267            |
| Asia                                   | 0.5 (0.2-1.6)                                   | .268            | 0.5 (0.2-1.3)                                                    | .143            |
| Other                                  | 1.2 (0.2-5.6)                                   | .837            | 0.9 (0.2-4.0)                                                    | .874            |
| <i>BMI Category</i>                    |                                                 |                 |                                                                  |                 |
| Underweight                            | 0.8 (0.4-1.7)                                   | .597            | 0.9 (0.5-1.7)                                                    | .739            |
| Normal weight                          | REF                                             |                 | REF                                                              |                 |

|                                           |               |      |               |      |
|-------------------------------------------|---------------|------|---------------|------|
| Overweight                                | 0.8 (0.4-1.6) | .517 | 0.8 (0.4-1.6) | .577 |
| Obese                                     | 1.1 (0.5-2.3) | .779 | 1.2 (0.6-2.2) | .670 |
| <i>Physical activity</i>                  |               |      |               |      |
| Sedentary                                 | REF           |      | REF           |      |
| Low PA                                    | 1.1 (0.8-1.7) | .500 | 1.0 (0.7-1.4) | .923 |
| Moderate PA                               | 1.0 (0.7-1.5) | .930 | 1.1 (0.8-1.6) | .648 |
| High PA                                   | 0.8 (0.5-1.2) | .323 | 0.8 (0.6-1.2) | .314 |
| <i>Sedentary behaviour (sitting time)</i> | 1.0 (0.9-1.0) | .071 | 1.0 (0.9-1.0) | .129 |
| <i>Diet quality</i>                       | 1.0 (1.0-1.0) | .586 | 1.0 (1.0-1.0) | .433 |
| <i>Alcohol intake</i>                     |               |      |               |      |
| None                                      | REF           |      | REF           |      |
| Any                                       | 0.7 (0.5-1.1) | .156 | 0.8 (0.6-1.2) | .249 |
| <i>Smoking</i>                            |               |      |               |      |
| Never or ex-smoker                        | REF           |      | REF           |      |
| Current smoker                            | 0.8 (0.5-1.1) | .097 | 0.8 (0.6-1.1) | .120 |
| <i>Depressive symptoms</i>                |               |      |               |      |
| No                                        | REF           |      | REF           |      |
| Yes                                       | 1.1 (0.8-1.5) | .472 | 1.0 (0.8-1.3) | .998 |
| <i>Anxiety symptoms</i>                   | 0.8 (0.8-1.1) | .192 | 0.9 (0.8-1.1) | .367 |
| <i>Stress</i>                             | 0.9 (0.7-1.1) | .274 | 0.9 (0.8-1.2) | .613 |

*Note.* REF indicates reference category. Significant associations are indicated in **bold**. Multivariable analysis adjusted for all other variables in the table.
